# Supplementary material
Source: publisher figshare collection journal article supplement (https://asha.figshare.com/articles/dataset/_/21476961)
Supplement: Supplementary file 1 [file 1]

## Supplemental Material S2. Best Practice Guidelines checklist from Stark et al. (2022).

| Category                                                                                | Item Number | Reporting Standard                                                                                                                                   | Included (Mark ‘x’) | Page Number(s) |
|-----------------------------------------------------------------------------------------|-------------|------------------------------------------------------------------------------------------------------------------------------------------------------|---------------------|----------------|
| <b>Information about the discourse sample</b>                                           | 1           | Define “discourse”                                                                                                                                   | x                   | 1-2            |
|                                                                                         | 2           | Define “utterance” (or other unit, e.g., turn unit)                                                                                                  | x                   | 4              |
|                                                                                         | 3*          | Number of words in sample                                                                                                                            |                     |                |
| <b>Information about how the discourse sample was collected</b>                         | 4           | Describe elicitation task                                                                                                                            | x                   | 3-4            |
|                                                                                         | 5           | Exact instructions used to elicit discourse sample                                                                                                   | x                   | 3-4            |
| <b>Information about the persons included in the collection of the discourse sample</b> | 6           | Demographic information about primary speaker [the person whose discourse is of interest]                                                            | x                   | 3              |
|                                                                                         | 7           | Information about the primary speaker's neurological condition                                                                                       | x                   | 3              |
| <b>Methodology and rater agreement</b>                                                  | 8           | Inter-rater reliability for each analyzed variable/measure                                                                                           | x                   | 4-5            |
|                                                                                         | 9           | Reliability statistics used                                                                                                                          | x                   | 4-5            |
|                                                                                         | 10          | Details on the number (percentage) of files used for determining reliability/agreement                                                               | x                   | 4-5            |
|                                                                                         | 11*         | Reliability (point to point agreement) for transcription (orthographic or other)                                                                     |                     |                |
| <b>Analysis</b>                                                                         | 12          | Type of transcription (e.g., orthographic, phonetic)                                                                                                 | x                   | 4              |
|                                                                                         | 13          | Detailed description of any perceptual rating scale used, including providing a copy of the scale if not previously published                        | n/a                 | n/a            |
|                                                                                         | 14          | Details of the annotation system, formal (e.g., CHAT) or informal (created by the clinician/examiner)                                                | x                   | 4              |
|                                                                                         | 15          | Whether transcription was verbatim (e.g., including all behaviors such as fillers) or whether information was excluded in the transcription process. | x                   | 4              |
|                                                                                         | 16          | Completeness of transcription (full, partial, transcribing errors only)                                                                              | x                   | 4              |
|                                                                                         | 17*         | Details of any software used for transcribing/annotating/generating data (e.g., SALT, CLAN, ELAN)                                                    | x                   | 4              |
|                                                                                         | 18*         | Who/what transcribed the sample (by a human, by a machine/software, hybrid human and software)                                                       | x                   | 4              |
|                                                                                         | 19          | What is being used as primary outcome measure(s) (e.g., linguistic information, speech information, etc.)                                            | n/a                 | n/a            |
| <b>Information about the individual discourse variables/behaviors reported</b>          | 20*         | Theoretical rationale for selecting variable/behavior/outcome measure(s)                                                                             |                     |                |
|                                                                                         | 21          | Operational definition for each variable/behavior/outcome(s)                                                                                         | x                   | 4              |

*Note.* Asterisks denote RECOMMENDED standards. All others are NECESSARY. Per a priori set criteria, NECESSARY reporting items are those noted as “highly” or “extremely” necessary by > 70% participants in Round 3 of the expert consensus process. RECOMMENDED items are those recommendations noted as “highly” or “extremely” necessary by > 65% in Round 2, but which did not reach “highly” or “extremely” necessary by > 70% participants in Round 3, or those rated “highly” or “extremely” necessary by > 70% in Round 1 that were not carried forward to subsequent rounds of the consensus process. n/a = not applicable.

Stark, B. C., Bryant, L., Themistocleous, H., den Ouden, D.-B., & Roberts, A. (2022). Best practice guidelines for reporting spoken discourse in aphasia and neurogenic communication disorders. *Aphasiology*. Advance online publication. <https://doi.org/10.1080/02687038.2022.2039372>. Visit <https://osf.io/y48n9/> for updates on the project.

Version 1.0 9/2021
