# Supplementary material
Source: publisher figshare collection journal article supplement (https://asha.figshare.com/articles/dataset/_/21476961)
Supplement: Supplementary file 2 [file 1]

## **Supplemental Material S1. Study procedure document for the remote assessment.**

### **Original Version (in French)**

#### **Guide de passation virtuelle des épreuves**

##### **Recrutement**

- Annonces affichées sur Facebook.
- Le participant doit nous contacter via courriel ou téléphone (utiliser le script téléphonique pour les personnes qui nous contactent par téléphone).
- Envoyer le formulaire d'information et de consentement par courriel avec l'adresse du laboratoire.
  - Le participant doit prendre connaissance du document, le signer, puis nous le retourner par courriel.

**Attendre de recevoir la copie signée du formulaire d'information et de consentement avant de passer à l'étape suivante.**

##### **Avant l'évaluation**

- Envoyer au participant le lien vers le sondage pré-entrevue sur la plateforme sécurisée RedCap.
- POUR LES PARTICIPANTS NON-FAMILIERS AVEC ZOOM, d'abord appeler le participant au téléphone pour lui offrir un accompagnement pour l'ouverture de l'appareil (ordi ou iPad) et l'application Zoom. Leur envoyer par courriel les documents et liens suivants.
  - Guide d'utilisation de zoom pour iPad ou ordinateur pour les participants qui n'ont pas d'expérience avec zoom.
  - Lien pour télécharger Zoom <https://zoom.us/download>
  - Liens vers des tutoriels d'utilisation de Zoom.  
[https://support.zoom.us/hc/fr?flash\\_digest=f3fd58514a60ffc5c80803437ca77b4325fc5a29](https://support.zoom.us/hc/fr?flash_digest=f3fd58514a60ffc5c80803437ca77b4325fc5a29)
- APRÈS AVOIR ACCOMPAGNÉ LES PARTICIPANTS NON-FAMILIERS AVEC ZOOM ET POUR LES PARTICIPANTS FAMILIERS AVEC ZOOM, faire un test Zoom avec la personne quelques jours avant l'évaluation. Donner une date et une heure précise au participant. Pendant ce test :
  - Ré-expliquer le déroulement de l'étude.
  - Pratiquer le partage d'écran.
  - Montrer au participant l'enregistrement de la séance.

- Planifier la rencontre virtuelle en indiquant la durée au participant.
- Créer le lien Zoom en nommant la rencontre avec le code du participant.
- Envoyer le lien Zoom au participant à l'avance.

[Modèles de réunion](#) > DC2000\_sesV1

|                            |                                                                                                                                                                                                                                                                                                                                                                                               |                          |
|----------------------------|-----------------------------------------------------------------------------------------------------------------------------------------------------------------------------------------------------------------------------------------------------------------------------------------------------------------------------------------------------------------------------------------------|--------------------------|
| Nom du modèle              | DC2000_sesV1                                                                                                                                                                                                                                                                                                                                                                                  |                          |
| Sujet                      | DC2000_sesV1                                                                                                                                                                                                                                                                                                                                                                                  |                          |
| Description                | Modèle pour séances                                                                                                                                                                                                                                                                                                                                                                           |                          |
| Mot de passe de la réunion | *****                                                                                                                                                                                                                                                                                                                                                                                         | <a href="#">Afficher</a> |
| Vidéo                      | Animateur                                                                                                                                                                                                                                                                                                                                                                                     | Activé                   |
|                            | Participant                                                                                                                                                                                                                                                                                                                                                                                   | Activé                   |
| Audio                      | Téléphone et audio de l'ordinateur                                                                                                                                                                                                                                                                                                                                                            |                          |
|                            | Composer le numéro de Canada et d'1 autre pays                                                                                                                                                                                                                                                                                                                                                |                          |
| Options de la réunion      | <div><div>✓ Ouvrir l'accès à la réunion avant l'arrivée de l'animateur</div><div>✗ Couper le micro des participants à l'entrée </div><div>✓ Activer la salle d'attente</div><div>✗ Seuls les utilisateurs authentifiés peuvent participer</div><div>✗ Enregistrer automatiquement la réunion</div></div> |                          |

## Le jour de l'évaluation

- Se connecter 10 minutes avant le début de la rencontre ou appel téléphonique pour accompagner le participant avec l'ouverture de l'appareil et de Zoom.

- S'assurer que la fenêtre avec le visage du participant est toujours bien visible.
- S'assurer que le participant est dans un environnement calme et peu bruyant. Lui rappeler au besoin.
- S'assurer que le participant vous entend bien et que vous l'entendez bien.
- S'assurer que le participant vous voit bien et que vous voyez clairement le participant.
- **Confirmer le début de l'enregistrement avec le participant. Débuter l'enregistrement.** Idéalement, découper l'enregistrement d'emblée en arrêtant et recommençant l'enregistrement à chacune des tâches. On peut débuter et cesser l'enregistrement de la séance avec le raccourci shift+ ⌘+ C. Faire un seul vidéo est également une option, mais il faudra le segmenter par la suite.
- Expliquer clairement chacune des consignes et valider la compréhension du participant.

#### **Tâche de description du pique-nique de la Western Aphasia Battery-Revised**

- **Partager votre écran avec l'image de la scène du pique-nique.**
- Veuillez-vous assurer que la fenêtre avec le visage du participant est toujours agrandie et clairement visible à des fins d'enregistrement afin de voir clairement son visage.
- Désactivez votre microphone lorsque la consigne est terminée pour éviter tout bruit de fond supplémentaire pendant que le participant parle.

#### **Après avoir complété l'évaluation**

- Faire compléter le sondage « Rétroaction suite à participation » au participant en envoyant le lien.
- Télécharger les vidéos et les déposer dans l'espace sécurisé prévu en utilisant la nomenclature des fichiers vidéos suivante :

**ParticipantAnnéeNuméro\_ses-Vnumérodetesting\_task-nomdelatâche**

Ex.: participant no.1 groupe contrôle testé en 2020, 1ere évaluation, tâche de description d'image du WAB = DC2001\_ses-V1\_task-WAB

## Translation in English

### Videoconference assessment guide

#### Recruitment

- Ads displayed on Facebook.
- The participant must contact us via email or telephone (use the telephone script for people who contact us by telephone).
- Send the information and consent form by email with the laboratory email address
  - The participant must read the document, sign it, then return it to us by email.

**Wait until the reception the signed copy of the consent form before proceeding to the next step.**

#### Before the assessment

- Send the participant the link to the pre-interview survey on the secure platform RedCap.
- FOR PARTICIPANTS NOT FAMILIAR WITH ZOOM, first call the participant on the phone to offer him support for opening the device (computer or iPad) and the Zoom application. Email them the following documents and links:
  - Link to download Zoom <https://zoom.us/download>
  - Link to Zoom tutorials [https://support.zoom.us/hc/fr?flash\\_digest=f3fd58514a60ffc5c80803437ca77b4325fc5a29](https://support.zoom.us/hc/fr?flash_digest=f3fd58514a60ffc5c80803437ca77b4325fc5a29)
- AFTER ACCOMPANYING PARTICIPANTS NOT FAMILIAR WITH ZOOM AND FOR PARTICIPANTS FAMILY WITH ZOOM, do a Zoom test with the person a few days before the assessment. Give a specific date and time to the participant. During this test:
  - Re-explain the course of the study.
  - Practice screen sharing.
  - Show the participant the recording of the session.
- Plan the virtual meeting by indicating the duration to the participant.
- Create the Zoom link by naming the meeting with the participant code.
- Send the Zoom link to the participant in advance.

### Day of the assessment

- Connect 10 minutes before the start of the meeting or phone call to accompany the participant with the opening of the device and Zoom.
- Make sure that the window with the participant's face is always clearly visible.
- Ensure that the participant is in a calm and quiet environment. Remind him if necessary.
- Make sure the participant can hear you and that you can hear them.
- Make sure the participant can see you clearly and that you can also see the participant clearly.
- **Confirm the start of recording with the participant. Start recording.** Ideally, cut the recording from the start by stopping and restarting the recording at each task. You can start and stop recording the session with the shortcut shift + ⌘ + C. Making a single video is also an option, but it will have to be segmented afterwards.
- Clearly explain each of the instructions and validate the participant's understanding.

### Western Aphasia Battery-Revised Picnic Description Task

- **Share your screen with the picnic scene image.**
- Please ensure that the window with the participant's face is always enlarged and clearly visible for recording purposes in order to see their face clearly.
- Mute your microphone when the briefing is over to avoid additional background noise while the participant is speaking.

### After completing the assessment

- Have the participant complete the "Feedback following participation" survey by sending the link.
- Download the videos and place them in the secure space provided using the following video file nomenclature:

**ParticipantYearNumber\_ses-Vsessionnumber\_task-nameofthetask**

Ex.: participant no.1 control group tested in 2020, first assessment, Western Aphasia Battery-Revised Picnic Description Task = DC2001\_ses-V1\_task-WAB
