# Supplementary material
Source: publisher figshare collection journal article supplement (https://asha.figshare.com/articles/dataset/_/21476961)
Supplement: Supplementary file 3 [file 1]

**Supplemental Material S3.** Interrater reliability for all variables expressed as two-way random effect intraclass correlations (ICC) for the videoconference group and the in-person group.

**Table S1.** Interrater reliability for all variables expressed as two-way random effect intraclass correlations (ICC) for the videoconference group.

| Variable                          | ICC  | 95% confidence interval | Standard error measurement |
|-----------------------------------|------|-------------------------|----------------------------|
| Duration (sec)                    | .995 | [.979, .999]            | 10.77                      |
| TU <sub>total</sub>               | .976 | [.902, .994]            | 0.48                       |
| Total number of utterances        | .953 | [.812, .988]            | 4.07                       |
| Words per minute                  | .979 | [.914, .995]            | 12.11                      |
| Mean length of utterances (words) | .751 | [−.003, .983]           | 1.67                       |
| Verbs per utterance               | .948 | [.789, .987]            | 0.09                       |
| Noun/verb ratio                   | .990 | [.961, .998]            | 0.34                       |
| Propositional density             | .989 | [.956, .997]            | 0.009                      |
| MATTR                             | .915 | [.657, .979]            | 0.006                      |
| Reformulation                     | .940 | [.758, .985]            | 1.76                       |
| Repetition                        | .837 | [.345, .960]            | 3.31                       |

*Note.* TU = thematic unit; MATTR = moving-average type-token ratio.

**Table S2.** Interrater reliability for all variables express as two-way random effect intraclass correlations (ICC) for the in-person group.

| Variable                          | ICC  | 95% confidence interval | Standard error measurement |
|-----------------------------------|------|-------------------------|----------------------------|
| Duration (sec)                    | .991 | [.976, .997]            | 7.85                       |
| TU <sub>total</sub>               | .910 | [.751, .967]            | 1.22                       |
| Total number of utterances        | .864 | [.625, .951]            | 8.04                       |
| Words per minute                  | .985 | [.958, .995]            | 11.48                      |
| Mean length of utterances (words) | .685 | [.129, .886]            | 1.78                       |
| Verbs per utterance               | .934 | [.819, .976]            | 0.12                       |
| Noun/verb ratio                   | .993 | [.982, .998]            | 0.56                       |
| Propositional density             | .987 | [.963, .995]            | 0.01                       |
| MATTR                             | .965 | [.902, .987]            | 0.008                      |
| Reformulation                     | .876 | [.658, .955]            | 1.18                       |
| Repetition                        | .907 | [.744, .966]            | 1.75                       |

*Note.* TU = thematic unit; MATTR = moving-average type-token ratio.
